# Supplementary material
Source: Springer Nature journal article supplement (https://www.springermedizin.de/resource/supplementary/12889_2013_5975_MOESM5_ESM.pdf/9496638)

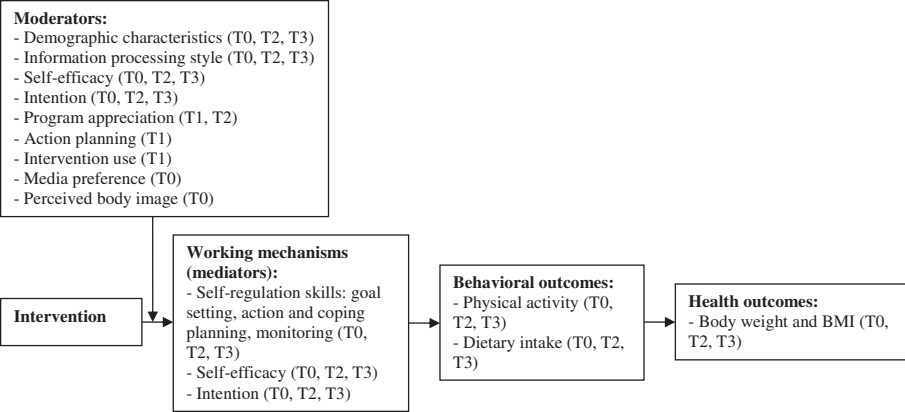

Supplement: MOESM5 [file 9496638]
